# Supplementary material for: Prediction of toluene/water partition coefficients in the SAMPL9 blind challenge: assessment of machine learning and IEF-PCM/MST continuum solvation models
Source: Royal Society of Chemistry journal article supplement (doi:10.1039/d3cp01428b), 2023-01-01
Supplement: d3cp01428b1.zip [file d3cp01428b1.zip]

## Sheet: Tol_training
name	compound	exptl. DGsolv	DGpredicted
1-butanol	0049but	-4.31	-4.47861
1-Butene	90	-2.39	-2.82911
1-Chloropropane	94	-3.56	-3.56963
1-heptanol	0058hep	-6.75	-6.24144
1-hexanol	0054hex	-6.12	-5.66328
1-nitropropane	0131nit	-5.25	-5.8616
1-pentanol	0052pen	-5.17	-5.08365
1-Pentene	97	-3.11	-3.39628
1-propanol	0047pro	-3.71	-3.90152
1,1-Difluoroethane	84	-1.74	-1.091
1,3-Butadiene	85	-2.54	-3.14997
1,4-Dibromobenzene	86	-8.31	-8.34522
1,4-dioxane	0062dio	-4.91	-4.40175
2-butanone	0076but	-4.27	-4.11021
2-heptanone	0082hep	-6.3	-5.83926
2-hexanone	0080hex	-5.6	-5.25929
2-Methylaniline	111	-7.57	-6.37094
2-Methylpentane	114	-3.59	-3.53492
2-Methylpropane	118	-2.1	-2.37697
2-Methylpropene	119	-2.39	-2.58642
2-pentanone	0078pen	-5.02	-4.68571
2,4-Dimethylpentane	100	-3.98	-3.95304
3,3-dimethylbutanone	0081dim	-5	-4.78042
4-methylaniline	n011	-7.39	-6.4762
4-Nitroaniline	138	-10.51	-10.08
aceticacid	0086eth	-4	-4.48621
acetone	0075pro	-3.59	-3.64569
Acetonitrile	145	-3.66	-4.67544
Acetophenone	17	-6.64	-6.29493
ammonia	0216amm	-2.38	-3.36697
aniline	0118ani	-6.69	-6.29972
Anthracene	146	-11.39	-7.9783
Benzamide	44	-9.68	-8.1441
Benzene	150	-4.46	-4.06283
Benzonitrile	153	-7.08	-7.2468
Bromoethane	157	-3.47	-4.17882
Butanal	160	-4	-4.3346
Butane	161	-2.36	-2.51406
butanoicacid	0088but	-5.24	-5.53925
butylacetate	0099but	-5.57	-5.88197
butylamine	0110but	-4.33	-4.82659
Caffeine	38	-12.27	-10.6604
Chloroethane	164	-2.97	-3.01126
Cyclohexane	167	-4.16	-3.4675
Di-isopropylether	178	-3.07	-4.25228
Dichloromethane	175	-3.69	-3.66416
diethylamine	0111die	-3.75	-4.00509
dimethylamine	0104dim	-2.68	-2.95363
Dimethylether	180	-2.17	-2.45742
dipropylamine	0115dip	-5.24	-5.14688
Ethane	184	-0.74	-1.36014
ethanol	0045eth	-3.33	-3.33795
Ethene	186	-0.69	-1.81785
ethylacetate	0095eth	-4.41	-4.73803
ethylamine	0103eth	-2.67	-3.67815
Ethylbenzene	188	-5.77	-4.9323
g-butyrolactone	0648gbu	-4.7	-5.60353
hexanoicacid	0090hex	-6.97	-6.69601
hydrogenperoxide	n017	-3.14	-4.27629
m-Cresol	4	-6.59	-5.98295
methanol	0044met	-2.18	-2.87068
methylacetate	0093met	-3.81	-4.1659
methylamine	0228met	-2.65	-3.12979
methylbenzoate	0240met	-7.96	-6.80368
methylhexanoate	0100met	-6.38	-6.37672
methylpentanoate	0098met	-5.65	-5.79056
methylpropanoate	0094met	-4.62	-4.66166
n-octane	0008noc	-5.38	-4.83328
Naphthalene	211	-7.87	-5.97639
Nitroethane	214	-4.62	-5.31653
nitromethane	0506nit	-4.31	-4.85898
o-cresol	0055ocr	-7.43	-5.87572
o-Xylene	16	-5.52	-4.67296
p-bromophenol	0215pbr	-8.7	-7.91964
p-cresol	0057pcr	-7.56	-5.97093
p-Xylene	236	-5.92	-4.67594
Pentane	226	-3.12	-3.096
pentanoicacid	0089pen	-5.89	-6.12047
pentylacetate	0101pen	-6.41	-6.45967
phenol	0053phe	-6.93	-5.67604
Propane	231	-1.6	-1.93952
propanoicacid	0087pro	-4.57	-4.95715
Propene	233	-1.69	-2.27566
Propionitrile	234	-4.29	-5.16979
propylacetate	0097pro	-5	-5.30538
propylamine	0106pro	-3.51	-4.25421
pyridine	0116pyr	-5.13	-5.1309
Tetrafluoromethane	242	1.13	0.801362
Tetrahydrofuran	243	-4.38	-3.64417
toluene	0036tol	-5.12	-4.371
trimethylamine	0107tri	-2.71	-2.89647
water	0217wat	-1.69	-3.18976

## Sheet: Bz_training
name	compound	exptl. DGsolv	DGpredicted
1-butanol	0049but	-4.45	-4.92429
1-heptanol	0058hep	-6.85	-6.81301
1-hexanol	0054hex	-6.13	-6.20006
1-octanol	0236oct	-8.06	-7.42907
1-pentanol	0052pen	-5.1	-5.58258
1-propanol	0047pro	-3.87	-4.30225
1,1-dimethyl-3-phenylurea	0401amia	-12.18	-9.267
1,4-dioxane	0062dio	-5.21	-3.96536
2-butanone	0076but	-4.46	-4.02033
2-heptanone	0082hep	-6.36	-5.86505
2-hexanone	0080hex	-5.76	-5.25663
2-methylaniline	n009	-7.37	-6.65196
2-methylpyridine	0119met	-5.86	-5.82495
2-pentanone	0078pen	-5.14	-4.6326
2,2-dichloroethenyldimethylphosphate	0433pho	-9.09	-9.09
2,6-dimethylpyridine	0125dim	-6.39	-6.12365
3-methylaniline	n010	-7.61	-6.7467
3,5-dimethylpyridine	0571dim	-7.64	-6.3867
4-methylaniline	n011	-7.59	-6.73816
4-methylpyridine	0121met	-6.17	-5.979
aceticacid	0086eth	-4.02	-4.35088
acetone	0075pro	-3.79	-3.51255
ammonia	0216amm	-1.12	-3.18672
aniline	0118ani	-6.88	-6.35483
benzamide	n008	-9.93	-7.83195
benzene	0035ben	-4.55	-4.77035
butanoicacid	0088but	-5.3	-5.48781
butylacetate	0099but	-5.78	-5.65374
cyclohexane	0018cyc	-4.05	-3.70024
diethyl4-nitrophenylthiophosphonate	0447pho	-8.58	-12.4259
diethylamine	0111die	-4.02	-4.37753
dimethyl4-nitrophenylthiophosphate	0441pho	-9.21	-11.2099
dimethylamine	0104dim	-3.01	-3.24541
dipropylamine	0115dip	-5.09	-5.60169
ethanol	0045eth	-3.42	-3.69962
ethylacetate	0095eth	-4.53	-4.42703
ethylamine	0103eth	-2.73	-3.77748
hexanoicacid	0090hex	-6.94	-6.71958
hydrazine	0229hyd	-4.02	-4.64538
isopropanol	0048pro	-3.48	-4.30208
m-cresol	0056mcr	-6.66	-6.54488
m-hydroxybenzaldehyde	0150mhy	-9.29	-7.69512
methanol	0044met	-2.58	-3.18541
methylacetate	0093met	-4.04	-3.82306
methylamine	0228met	-2.66	-3.18409
methylbenzoate	0240met	-6.27	-6.64826
methylhexanoate	0100met	-6.47	-6.19408
methylpentanoate	0098met	-5.83	-5.5834
methylpropanoate	0094met	-4.58	-4.34554
n-hexane	0006nhe	-3.62	-4.20724
N-methylaniline	0122Nme	-6.64	-6.38197
n-octane	0008noc	-5.35	-5.43123
n-pentane	0005npe	-2.99	-3.58443
nitrobenzene	0134nit	-7.6	-6.87388
nitromethane	0506nit	-4.5	-4.21517
o-cresol	0055ocr	-7.44	-6.44857
p-bromophenol	0215pbr	-8.81	-8.81
p-cresol	0057pcr	-7.35	-6.53581
p-hydroxybenzaldehyde	0151phy	-9.73	-7.82833
pentanoicacid	0089pen	-6.01	-6.10938
pentylacetate	0101pen	-6.53	-6.27092
phenol	0053phe	-7.12	-6.1403
piperidine	0225pipa	-5.03	-4.52443
propanoicacid	0087pro	-4.75	-4.89017
propylacetate	0097pro	-5.21	-5.03513
propylamine	0106pro	-3.68	-4.3917
pyridine	0116pyr	-5.28	-5.51739
t-butanol	0050met	-3.7	-4.65523
toluene	0036tol	-5.32	-4.87852
triethylphosphate	0221tri	-8.58	-7.98261
trimethylamine	0107tri	-2.8	-3.46149
trimethylphosphate	0220tri	-8.02	-6.21074
tripropylphosphate	0222tri	-9.34	-9.79619
water	0217wat	-1.71	-3.33471

## Sheet: Tol_Bz_training_common
toluene						benzene
name	compound	DGsolv	DGele	DGCav	DGvW	name	compound	DGsolv	DGele	DGCav	DGvW
1-butanol	0049but	-4.31	-0.79	21.77	-25.29	1-butanol	0049but	-4.45	-0.64	23.45	-27.26
1-heptanol	0058hep	-6.75	-0.81	34.1	-40.04	1-heptanol	0058hep	-6.85	-0.67	36.74	-42.92
1-hexanol	0054hex	-6.12	-0.81	30	-35.31	1-hexanol	0054hex	-6.13	-0.67	32.32	-37.78
1-pentanol	0052pen	-5.17	-0.8	25.89	-30.26	1-pentanol	0052pen	-5.1	-0.67	27.9	-32.33
1-propanol	0047pro	-3.71	-0.79	17.67	-20.59	1-propanol	0047pro	-3.87	-0.63	19.03	-22.27
1,4-dioxane	0062dio	-4.91	-0.62	19.94	-24.23	1,4-dioxane	0062dio	-5.21	-0.5	21.52	-26.23
2-butanone	0076but	-4.27	-0.8	19.94	-23.41	2-butanone	0076but	-4.46	-0.67	21.49	-25.28
2-heptanone	0082hep	-6.3	-0.81	32.24	-37.73	2-heptanone	0082hep	-6.36	-0.67	34.78	-40.47
2-hexanone	0080hex	-5.6	-0.8	28.16	-32.96	2-hexanone	0080hex	-5.76	-0.68	30.36	-35.44
2-methylaniline	111	-7.57	-0.98	23.63	-30.22	2-methylaniline	n009	-7.37	-0.79	25.49	-32.07
2-pentanone	0078pen	-5.02	-0.8	24.05	-28.27	2-pentanone	0078pen	-5.14	-0.67	25.93	-30.4
4-methylaniline	n011	-7.39	-1.04	23.75	-30.1	4-methylaniline	n011	-7.59	-0.82	25.65	-32.42
aceticacid	0086eth	-4	-1.16	13	-15.84	aceticacid	0086eth	-4.02	-0.93	14.02	-17.11
acetone	0075pro	-3.59	-0.9	15.88	-18.57	acetone	0075pro	-3.79	-0.77	17.13	-20.15
ammonia	0216amm	-2.38	-0.99	5.63	-7.02	ammonia	0216amm	-1.12	-0.81	6.06	-6.37
aniline	0118ani	-6.69	-1.09	19.99	-25.59	aniline	0118ani	-6.88	-0.87	21.19	-27.2
benzamide	44	-9.68	-1.75	22.95	-30.88	benzamide	n008	-9.93	-1.44	24.76	-33.25
benzene	150	-4.46	-0.35	17.71	-21.82	benzene	0035ben	-4.55	-0.28	20.06	-24.33
butanoicacid	0088but	-5.24	-1.06	21.19	-25.37	butanoicacid	0088but	-5.3	-0.84	22.85	-27.31
butylacetate	0099but	-5.57	-0.75	29.72	-34.54	butylacetate	0099but	-5.78	-0.63	32.05	-37.2
Cyclohexane	167	-4.16	-0.01	24.62	-28.77	cyclohexane	0018cyc	-4.05	-0.01	26.53	-30.57
diethylamine	0111die	-3.75	-0.35	22.6	-26	diethylamine	0111die	-4.02	-0.27	24.35	-28.1
dimethylamine	0104dim	-2.68	-0.42	14.65	-16.91	dimethylamine	0104dim	-3.01	-0.33	15.78	-18.46
dipropylamine	0115dip	-5.24	-0.36	30.74	-35.62	dipropylamine	0115dip	-5.09	-0.28	33.12	-37.93
ethanol	0045eth	-3.33	-0.8	13.57	-16.1	ethanol	0045eth	-3.42	-0.64	14.61	-17.39
ethylacetate	0095eth	-4.41	-0.76	21.53	-25.18	ethylacetate	0095eth	-4.53	-0.63	23.22	-27.12
ethylamine	0103eth	-2.67	-0.65	14.26	-16.28	ethylamine	0103eth	-2.73	-0.52	15.36	-17.57
hexanoicacid	0090hex	-6.97	-1.07	29.4	-35.3	hexanoicacid	0090hex	-6.94	-0.84	31.69	-37.79
m-Cresol	4	-6.59	-1.02	23.1	-28.67	m-cresol	0056mcr	-6.66	-0.83	24.92	-30.75
methanol	0044met	-2.18	-0.89	9.49	-10.78	methanol	0044met	-2.58	-0.73	10.23	-12.08
methylacetate	0093met	-3.81	-0.75	17.43	-20.49	methylacetate	0093met	-4.04	-0.63	18.8	-22.21
methylamine	0228met	-2.65	-0.67	10.16	-12.14	methylamine	0228met	-2.66	-0.53	10.94	-13.07
methylbenzoate	0240met	-7.96	-0.8	26.64	-33.8	methylbenzoate	0240met	-6.27	-0.66	28.75	-34.36
methylhexanoate	0100met	-6.38	-0.67	33.82	-39.53	methylhexanoate	0100met	-6.47	-0.55	36.46	-42.38
methylpentanoate	0098met	-5.65	-0.66	29.72	-34.71	methylpentanoate	0098met	-5.83	-0.55	32.04	-37.32
methylpropanoate	0094met	-4.62	-0.67	21.56	-25.51	methylpropanoate	0094met	-4.58	-0.54	23.2	-27.24
n-octane	0008noc	-5.38	-0.03	36.87	-42.22	n-octane	0008noc	-5.35	-0.02	39.73	-45.06
nitromethane	0506nit	-4.31	-1.2	16.27	-19.69	nitromethane	0506nit	-4.5	-1.11	13.2	-16.59
o-cresol	0055ocr	-7.43	-0.94	23.02	-29.51	o-cresol	0055ocr	-7.44	-0.76	24.83	-31.51
p-bromophenol	0215pbr	-8.7	-1.12	21.77	-29.35	p-bromophenol	0215pbr	-8.81	-0.92	23.56	-31.45
p-cresol	0057pcr	-7.56	-1	23.1	-29.66	p-cresol	0057pcr	-7.35	-0.82	24.93	-31.46
pentane	226	-3.12	-0.02	24.57	-27.67	n-pentane	0005npe	-2.99	-0.01	26.47	-29.45
pentanoicacid	0089pen	-5.89	-1.06	25.33	-30.16	pentanoicacid	0089pen	-6.01	-0.85	27.27	-32.43
pentylacetate	0101pen	-6.41	-0.75	33.82	-39.48	pentylacetate	0101pen	-6.53	-0.63	36.47	-42.37
phenol	0053phe	-6.93	-1.03	18.99	-24.89	phenol	0053phe	-7.12	-0.84	20.5	-26.78
propanoicacid	0087pro	-4.57	-1.06	17.09	-20.6	propanoicacid	0087pro	-4.75	-0.86	18.43	-22.32
propylacetate	0097pro	-5	-0.75	25.61	-29.86	propylacetate	0097pro	-5.21	-0.62	27.62	-32.21
propylamine	0106pro	-3.51	-0.65	18.36	-21.22	propylamine	0106pro	-3.68	-0.52	19.78	-22.94
pyridine	0116pyr	-5.13	-0.68	16.6	-21.05	pyridine	0116pyr	-5.28	-0.57	17.93	-22.64
toluene	0036tol	-5.12	-0.33	21.82	-26.61	toluene	0036tol	-5.32	-0.28	23.55	-28.59
trimethylamine	0107tri	-2.71	-0.21	19.08	-21.58	trimethylamine	0107tri	-2.8	-0.16	20.56	-23.2
water	0217wat	-1.69	-1.48	4.91	-5.12	water	0217wat	-1.71	-1.21	5.28	-5.78

## Sheet: Tol_test_logP
Compound	logPexp	logP tol Calc
Furfural	0.6	0.364899
2-Isopropyl phenol	2.1	1.80532
Catechol	-1.29	-2.99496
4-Methylcatechol	-0.67	-1.89289
Resorcinol	-2.12	-3.32225
1,3-Dimethoxybenzene	2.82	2.3763
Guaiacol	1.21	1.02987
Vanillin	0.69	0.250114
Isovanilliin	0.4	0.218452
Hydroquinone	-2.26	-3.07917
1,4-Dimethoxybenzene	2.7	2.44238
p-Anisaldehyde	2.06	1.83781
2'-Hydroxyacetophenone	2.48	1.62719
Antraquinone	3.7	3.83088
9-Hydroxyfluorene	2.31	1.61843
Pyrogallol	-2.94	-4.88816
3-Methoxycatechol	-0.45	-1.34593
Gallic acid	-4.09	-5.76466
Vanillic acid	-1.17	-0.994749
4-Hydroxybenzoic acid	-2.31	-3.03259
p-Anisic acid	0.54	0.275591
4-(Trifluoromethyl)aniline	2.28	0.174751
Diphenylamine	3.97	2.63363
Sulfanilamide	-2.5	-5.93209
Benzimidazole	-0.84	-1.21964
5-Nitrobenzimidazole	-0.81	-0.959781
Thymine	-3.45	-3.95789
Phenytoin	0.7	0.227288
1-Naphthol	1.81	0.984576
B-Estradiol	2.02	1.67542
2-naphthoic acid	1.87	0.779778
3,5-dimethoxyphenol	0.73	-0.239925
3-chlorophenol	0.98	0.151475
4-nitrophenol	-0.09	-0.704436
Flumequine	1.5	-0.0715253
Phenylacetic acid	0.02	-0.0632362
Thymol	2.17	1.26501
1-Chloroanthraquinone	4.68	4.37355
1-Chlorobutane	3.07	2.21499
1-Naphthylamine	2.43	0.294576
1-Nitronaphthalene	4.09	3.44962
2,4-Dichlorophenol	1.87	2.01794
2,4-Dimethylphenol	1.26	0.556818
2,4-Dinitrophenol	1.94	1.46041
2,5-Dimethylphenol	1.43	1.08124
2-Bromophenol	1.61	0.584143
2-Chloroethanol	-1.18	-0.681259
2-Chlorophenol	1.37	-0.262557
2-Fluorophenol	0.46	0.138864
2-Furaldehyde	0.61	0.13465
2-Methylbenzoicacid	1.23	0.648138
2-Methylbuta-1,3-diene	2.93	1.48647
2-Methylphenol	1.14	0.699748
2-Methylpropan-1-ol	-0.21	-0.479104
2-Methylpropan-2-ol	-0.54	-0.565928
2-Naphthol	1.68	0.217815
2-Naphthylamine	2.33	0.269864
2-Nitroaniline	1.65	0.0666933
2-Nitrophenol	2.26	1.89416
3,4-Dimethylphenol	1.23	-0.463263
3,5-Dimethylphenol	1.29	0.334463
3-Chlorobenzoicacid	1.12	0.686269
3-Methyl-1-butene	3.49	2.00182
3-Methylbutan-1-ol	0.43	0.410269
3-Nitroaniline	1.19	-0.42249
3-Nitrobenzoicacid	0.14	-0.0999254
3-Nitrophenol	0.34	-0.174834
4-Chlorobenzoicacid	1.26	0.551576
4-Chlorophenol	1.08	0.0490661
4-Ethylphenol	1.28	0.0621148
4-Methylbenzoicacid	0.65	-0.160588
4-Nitrobenzoicacid	0.62	0.0270318
4-NitropyridineN-oxide	-0.6	0.480904
5-Methylfurfural	0.98	0.81784
8-Hydroxyquinoline	2.25	2.09317
9-Fluorenone	4.31	3.52489
Acetoneoxime	-0.96	-0.985536
Apocynin	0.63	0.586836
Benzoic acid	0.36	-0.28791
Biphenyl	4.82	3.8301
BisphenolA	1.08	-0.106405
Butan-2-ol	-0.31	-0.374548
Chlorotrifluoromethane	1.95	2.33083
cis-2-Butene	2.92	1.55808
Cyclohexanoneoxime	0.31	0.904088
Dichlorodifluoromethane	2.15	3.05131
Diethyl ether	1.3	1.79508
Ethylcyclohexane	5.5	4.30281
Ethyl-t-butyl-ether	1.74	3.36868
Fluoranthene	5.93	4.67181
Methyl-t-butyl-ether	1.1	1.99441
Methyl-t-pentyl-ether	1.71	2.31548
Nicotine	0.86	3.37082
N-Methylthalidomide	1.98	2.11739
p-Chloro-1-phenyl-3,3-dimethylurea	0.97	2.93376
Phenanthrene	5.47	3.93316
Propanone	-0.21	0.0434675
Pyrene	5.94	4.65939
Salicylic acid	0.39	-0.686161
Tetrachloromethane	3.36	4.13475
Thalidomide	0.32	0.791908
Thioxanthen-9-one	4.22	3.42657
trans-2-Butene	2.85	1.58135
trans-Stilbene	5.54	5.87619
Trichloromethane	2.33	2.49564
Tryptamine	0.27	-0.64441
Coniferyl aldehyde	0.98	0.352761
Syringaldehyde	0.6	0.478644
Syringic acid	-1.29	-1.37889
trans-Ferulic acid	-0.62	-0.65736
Dimethyl phthalate	2.29	2.70716
4-phenylbutylamine	1.69	1.48149
4-propoxybenzoic acid	1.52	0.0387625
Flurbiprofen	3.07	2.77171
Ibuprofen Na	2.89	2.19553
Naproxen	2.32	1.828
Tetracaine	3.29	4.2396
1-Chlorohexane	4.3	3.27571
Benzoylacetone	2.914	2.26552
Deprenyl	3.49	3.89066
Di-n-butylether	3.678	3.85554
Ephedrine	0.4	1.43255
Heptane	5.295	3.91598
Hex-1-ene	4.003	2.87516
Hexane	4.641	3.36003

## Sheet: Bz_test_logP
Compound	logPexp	logP Bz Calc
o-aminobenzoicacid_1	-0.4	-1.21046
benzoylacetone_1	3.03	3.46661
sulfathiazole_1	-0.96	-2.42991
trichloroaceticacid	-1.3	0.501218
p-toluidine	1.43	-0.0515263
o-methoxybenzoicacid	2.68	1.21368
pentobarbital	0.74	-0.708478
barbital	-0.77	-2.17976
4-methylphenol	0.89	-0.329605
p-nitrophenol	0.17	-0.991802
m-nitrophenol	0.48	-0.454433
vanillin	0.82	-0.0606446
2-naphthol	1.74	0.885983
chloroaceticacid	-1.6	-2.43644
o-hydroxybenzoicacid	0.5	-0.25035
m-nitrobenzoicacid	0.21	-0.396237
4-chlorophenol	1.13	0.536307
o-nitrophenol	2.32	1.72804
2-6-dimethylphenol	1.77	1.24145
acetophenone	2.2	1.67895
o-vanillin	1.87	1.36264
2-4-dimethylphenol	1.34	0.84167
isovanillin	0.74	0.246107
benzylamine	0.61	0.132012
3-chlorophenol	1.12	0.645476
2-chlorophenol	1.46	1.91118
phenobarbital	-0.01	-0.456185
anisole	2.73	2.29901
p-hydroxyanisole	0.27	-0.157528
dichloroaceticacid	-1.4	-0.996051
benzoicacid	0.21	-0.137215
n-butylamine	-0.08	0.185182
2-5-dimethylphenol	1.52	1.65027
acetanilide	0.22	0.33681
isobutylalcohol	-0.11	-0.0244779
8-quinolinol	2.8	2.72562
2-methylphenol	1.14	1.09776
3-5-dimethylphenol	1.33	1.29809
3-methylphenol	0.84	0.87178
o-hydroxyanisole	1.32	1.30249
